# Supplementary material
Source: publisher site journal article supplement (https://www.dovepress.com/article/548871)
Supplement: Supplementary file 1 [file 548871%20Supplementary%20Figure.pdf]

## Supplementary Figure

### S1 File: Search concepts and database search

#### S1A. Literature search concepts and sub-concepts/MeSH terms

| Search query       | Search concepts             | Sub-concepts/ MeSH terms                                                                                                    |
|--------------------|-----------------------------|-----------------------------------------------------------------------------------------------------------------------------|
| 1                  | Location                    | “Afghan*” OR “Bangladesh*” OR “Bhutan*” OR “India*” OR “Maldiv*” OR “Nepal*” OR “Pakistan*” OR “Sri Lanka*” OR “South Asia” |
| 2                  | Population                  | “Medical Student*” OR “Student Medical” OR “Medical Undergraduate*”                                                         |
| 3                  | Exposure                    | “Learning Environment*” OR “Medical Education*” OR “Educational Environment”                                                |
| 4                  | Outcome                     | “Perception” OR “Perception*”                                                                                               |
| Final search query | Intersection of four topics | 1 AND 2 AND 3 AND 4                                                                                                         |

#### S1B. Database search

| Database | Query                                                                                                                                                                                                                                                                                                                                                                      | Result |
|----------|----------------------------------------------------------------------------------------------------------------------------------------------------------------------------------------------------------------------------------------------------------------------------------------------------------------------------------------------------------------------------|--------|
| PubMed   | (“Afghan*” OR “Bangladesh*” OR “Bhutan*” OR “India*” OR “Maldiv*” OR “Nepal*” OR “Pakistan*” OR “Sri Lanka*” OR “South Asia”) AND (“Learning Environment*” OR “Medical Education*” OR “Educational Environment” OR “Education Medical”) AND (“Student*” OR “Medical Student*” OR “Student Medical” OR “Undergraduate*” OR “Resident*”) AND (“Perception” OR “Perception*”) | 729    |
| Scopus   | (“Afghan*” OR “Bangladesh*” OR “Bhutan*” OR “India*” OR “Maldiv*” OR “Nepal*” OR “Pakistan*” OR “Sri Lanka*” OR “South Asia”) AND (“Learning Environment*” OR “Medical Education*” OR “Educational Environment” OR “Education Medical”) AND (“Student*” OR “Medical Student*” OR “Student Medical” OR “Undergraduate*” OR “Resident*”) AND (“Perception” OR “Perception*”) | 442    |

Note: \* stands for truncation.

**S2. JBI checklist of cross-sectional studies critical appraisal of methodological quality assessment tool result.**

| No | Studies included                        | Q1    | Q2     | Q3     | Q4     | Q5    | Q6    | Q7    | Q8     | Total |
|----|-----------------------------------------|-------|--------|--------|--------|-------|-------|-------|--------|-------|
| 1  | Ellawala et al. (2021) <sup>26</sup>    | Yes-1 | Yes-1  | Yes-1  | No-0   | Yes-1 | Yes-1 | Yes-1 | Yes-1  | 90%   |
| 2  | Shah et al. (2019) <sup>38</sup>        | Yes-1 | Yes-1  | Yes-1  | Yes-1  | No-0  | No-0  | Yes-1 | Yes-1  | 77%   |
| 3  | Azim et al. (2024) <sup>37</sup>        | Yes-1 | Yes-1  | Yes-1  | Yes-1  | Yes-1 | Yes-1 | Yes-1 | Yes-1  | 100%  |
| 4  | Bannur et al. (2024) <sup>35</sup>      | Yes-1 | Yes-1  | Yes-1  | Yes-1  | No-0  | No-0  | Yes-1 | Yes-1  | 77%   |
| 5  | Algotar et al. (2024) <sup>33</sup>     | Yes-1 | Yes-1  | Yes-1  | Yes-1  | No-0  | No-0  | Yes-1 | Yes-1  | 77%   |
| 6  | Zuberi et al. (2024) <sup>30</sup>      | Yes-1 | Yes-1  | Yes-1  | No-0   | No-0  | No-0  | Yes-1 | Yes-1  | 65%   |
| 7  | Wijesinghe et al. (2023) <sup>29</sup>  | Yes-1 | Yes-1  | Yes-1  | No-0   | No-0  | No-0  | Yes-1 | Yes-1  | 65%   |
| 8  | Chellaiyan et al. (2023) <sup>36</sup>  | Yes-1 | Yes-1  | Yes-1  | Yes-1  | Yes-1 | No-0  | No-0  | Yes-1  | 77%   |
| 9  | Tufai al. (2021) <sup>28</sup>          | Yes-1 | Yes-1  | Yes-1  | Yes-1  | Yes-1 | Yes-1 | Yes-1 | Yes-1  | 100%  |
| 10 | Khan et al. (2021) <sup>18</sup>        | Yes-1 | Yes-1  | Yes -1 | Yes -1 | Yes-1 | No-0  | No-0  | Yes -1 | 77%   |
| 11 | Amaranathan et al. (2018) <sup>34</sup> | Yes-1 | Yes -1 | Yes-1  | Yes-1  | Yes-1 | No-0  | No-0  | Yes-1  | 77%   |
| 12 | Sengupta et al. (2017) <sup>40</sup>    | Yes-1 | Yes-1  | Yes-1  | No-0   | Yes-1 | Yes-1 | Yes-1 | Yes-1  | 90%   |

|    |                                     |       |       |       |       |       |       |      |       |     |
|----|-------------------------------------|-------|-------|-------|-------|-------|-------|------|-------|-----|
| 13 | Abraham et al. (2008) <sup>16</sup> | Yes-1 | Yes-1 | Yes-1 | Yes-1 | Yes-1 | Yes-1 | No-0 | Yes-1 | 90% |
| 14 | Jawaid et al. (2013) <sup>17</sup>  | Yes-1 | Yes-1 | Yes-1 | Yes-1 | Yes-1 | No-0  | No-0 | Yes-1 | 77% |
| 15 | Nahar et al. (2011) <sup>39</sup>   | Yes-1 | Yes-1 | Yes-1 | No-0  | Yes-1 | No-0  | No-0 | Yes-1 | 65% |

1. *Were the criteria for inclusion in the sample clearly defined?*
2. *Were the study subjects and the setting described in detail?*
3. *Was the exposure measured in a valid and reliable way?*
4. *Were objective, standard criteria used for measurement of the condition?*
5. *Were confounding factors identified?*
6. *Were strategies to deal with confounding factors stated?*
7. *Were the outcomes measured in a valid and reliable way?*
8. *Was appropriate statistical analysis used?*
